# Supplementary material
Source: publisher figshare collection journal article supplement (https://asha.figshare.com/articles/dataset/_/27105865)
Supplement: Supplementary file 2 [file 1]

**Supplemental Material S1.** Ratings of directional pairs by participant.

| Directional Pairs    |                  |    | Participants |    |    |    |    |    |    |    |    |    |     |      |      |  |
|----------------------|------------------|----|--------------|----|----|----|----|----|----|----|----|----|-----|------|------|--|
| From                 | To               | 1  | 2            | 3  | 4  | 5  | 6  | 7  | 8  | 9  | 10 | 11 | Med | M    | SD   |  |
| Lesion Size and Site | Aphasia Severity | 10 | 10           | 10 | 9  | 9  | 9  | 10 | 7  | 9  | 10 | 8  | 9   | 9.18 | 0.98 |  |
| Motivation           | Participation    | 5  | 6            | 10 | 9  | 10 | 9  | 10 | 7  | 9  | 8  | 10 | 9   | 8.45 | 1.75 |  |
| Depression           | Motivation       | 5  | 9            | 10 | 8  | 6  | 10 | 10 | 8  | 6  | 8  | 10 | 8   | 8.18 | 1.83 |  |
| Loneliness           | Depression       | 7  | 7            | 10 | 10 | 7  | 8  | 10 | 8  | 6  | 7  | 10 | 8   | 8.18 | 1.54 |  |
| Depression           | Fatigue          | 5  | 9            | 9  | 9  | 8  | 7  | 8  | 7  | 9  | 7  | 10 | 8   | 8.00 | 1.41 |  |
| Depression           | Participation    | 7  | 7            | 10 | 10 | 6  | 9  | 5  | 8  | 9  | 8  | 9  | 8   | 8.00 | 1.61 |  |
| Lesion Size and Site | Aphasia Type     | 5  | 10           | 10 | 9  | 8  | 9  | 10 | 0  | 5  | 10 | 10 | 9   | 7.82 | 3.22 |  |
| Social Support       | Resilience       | 7  | 9            | 9  | 9  | 7  | 7  | 9  | 5  | 4  | 10 | 10 | 9   | 7.82 | 1.99 |  |
| Depression           | Resilience       | 7  | 6            | 10 | 8  | 6  | 8  | 8  | 6  | 6  | 9  | 10 | 8   | 7.64 | 1.57 |  |
| Depression           | Loneliness       | 7  | 6            | 10 | 10 | 3  | 7  | 10 | 5  | 10 | 5  | 10 | 7   | 7.55 | 2.58 |  |
| Social Support       | Depression       | 5  | 5            | 10 | 8  | 7  | 8  | 8  | 10 | 2  | 7  | 10 | 8   | 7.27 | 2.49 |  |
| Social Support       | Participation    | 5  | 8            | 10 | 9  | 6  | 8  | 7  | 6  | 6  | 7  | 8  | 7   | 7.27 | 1.49 |  |
| Fatigue              | Participation    | 7  | 9            | 8  | 9  | 2  | 9  | 8  | 4  | 6  | 7  | 10 | 8   | 7.18 | 2.40 |  |
| Lesion Size and Site | Cognition        | 7  | 10           | 8  | 10 | 5  | 9  | 10 | 3  | 1  | 9  | 7  | 8   | 7.18 | 3.03 |  |
| Social Support       | Motivation       | 5  | 5            | 9  | 8  | 8  | 8  | 8  | 4  | 7  | 8  | 9  | 8   | 7.18 | 1.72 |  |
| Resilience           | Participation    | 4  | 8            | 9  | 8  | 9  | 7  | 8  | 4  | 2  | 9  | 10 | 8   | 7.09 | 2.59 |  |
| Social Support       | Loneliness       | 9  | 8            | 0  | 8  | 8  | 8  | 10 | 7  | 10 | 7  | 3  | 8   | 7.09 | 3.02 |  |
| Aphasia Severity     | Loneliness       | 5  | 7            | 8  | 10 | 4  | 7  | 5  | 5  | 7  | 8  | 10 | 7   | 6.91 | 2.02 |  |
| Depression           | Anxiety          | 8  | 6            | 9  | 9  | 8  | 5  | 5  | 7  | 5  | 5  | 9  | 7   | 6.91 | 1.76 |  |
| Neuroplasticity      | Aphasia Severity | 7  | 10           | 9  | 8  | 7  | 9  | 10 | 0  | 3  | 8  | 4  | 8   | 6.82 | 3.19 |  |
| Time Post-onset      | Neuroplasticity  | 5  | 9            | 8  | 5  | 7  | 8  | 9  | 7  | 4  | 5  | 8  | 7   | 6.82 | 1.78 |  |
| Fatigue              | Motivation       | 5  | 7            | 9  | 9  | 7  | 8  | 5  | 4  | 5  | 5  | 10 | 7   | 6.73 | 2.05 |  |
| Neuroplasticity      | Cognition        | 5  | 8            | 8  | 8  | 8  | 8  | 10 | 3  | 1  | 5  | 10 | 8   | 6.73 | 2.87 |  |
| Aphasia Severity     | Depression       | 7  | 4            | 8  | 10 | 5  | 6  | 8  | 5  | 4  | 8  | 8  | 7   | 6.64 | 1.96 |  |
| Anxiety              | Motivation       | 5  | 7            | 8  | 10 | 4  | 6  | 5  | 5  | 9  | 5  | 8  | 6   | 6.55 | 1.97 |  |
| Motivation           | Resilience       | 4  | 1            | 7  | 7  | 9  | 7  | 9  | 5  | 6  | 8  | 8  | 7   | 6.45 | 2.38 |  |
| Participation        | Neuroplasticity  | 5  | 10           | 8  | 8  | 6  | 8  | 10 | 5  | 0  | 7  | 4  | 7   | 6.45 | 2.91 |  |
| Age                  | Fatigue          | 4  | 10           | 8  | 7  | 5  | 6  | 3  | 6  | 5  | 9  | 7  | 6   | 6.36 | 2.11 |  |

|                      |                 |   |    |    |    |    |   |   |   |    |   |    |   |      |      |
|----------------------|-----------------|---|----|----|----|----|---|---|---|----|---|----|---|------|------|
| Age                  | Neuroplasticity | 5 | 10 | 8  | 8  | 9  | 9 | 0 | 5 | 0  | 8 | 8  | 8 | 6.36 | 3.50 |
| Loneliness           | Motivation      | 4 | 7  | 7  | 9  | 5  | 8 | 6 | 6 | 2  | 7 | 9  | 7 | 6.36 | 2.11 |
| Loneliness           | Participation   | 5 | 7  | 8  | 10 | 8  | 7 | 5 | 4 | 4  | 5 | 7  | 7 | 6.36 | 1.91 |
| Participation        | Depression      | 3 | 6  | 7  | 8  | 9  | 7 | 2 | 7 | 8  | 7 | 6  | 7 | 6.36 | 2.11 |
| Social Support       | Anxiety         | 7 | 4  | 8  | 8  | 5  | 6 | 0 | 5 | 10 | 7 | 10 | 7 | 6.36 | 2.87 |
| Anxiety              | Participation   | 5 | 7  | 10 | 8  | 4  | 8 | 3 | 8 | 4  | 7 | 5  | 7 | 6.27 | 2.20 |
| Loneliness           | Resilience      | 4 | 5  | 8  | 8  | 6  | 6 | 8 | 5 | 4  | 7 | 8  | 6 | 6.27 | 1.62 |
| Resilience           | Motivation      | 4 | 5  | 9  | 8  | 8  | 7 | 7 | 3 | 1  | 7 | 10 | 7 | 6.27 | 2.72 |
| Anxiety              | Depression      | 4 | 6  | 10 | 8  | 8  | 3 | 5 | 5 | 7  | 7 | 5  | 6 | 6.18 | 2.04 |
| Depression           | Cognition       | 7 | 3  | 5  | 8  | 5  | 5 | 5 | 6 | 6  | 8 | 10 | 6 | 6.18 | 1.94 |
| Lesion Size and Site | Neuroplasticity | 8 | 1  | 7  | 7  | 9  | 9 | 9 | 5 | 2  | 8 | 3  | 7 | 6.18 | 2.96 |
| Aphasia Severity     | Participation   | 4 | 8  | 7  | 9  | 5  | 7 | 3 | 8 | 5  | 4 | 7  | 7 | 6.09 | 1.97 |
| Aphasia Type         | Loneliness      | 4 | 7  | 9  | 8  | 6  | 5 | 5 | 5 | 3  | 5 | 9  | 5 | 6.00 | 2.00 |
| Anxiety              | Fatigue         | 5 | 4  | 7  | 5  | 5  | 6 | 7 | 7 | 6  | 5 | 8  | 6 | 5.91 | 1.22 |
| Aphasia Type         | Depression      | 8 | 5  | 8  | 9  | 5  | 5 | 5 | 4 | 6  | 5 | 5  | 5 | 5.91 | 1.64 |
| Cognition            | Neuroplasticity | 4 | 5  | 8  | 7  | 9  | 8 | 3 | 2 | 4  | 5 | 10 | 5 | 5.91 | 2.63 |
| Participation        | Motivation      | 0 | 3  | 8  | 8  | 8  | 7 | 5 | 3 | 8  | 7 | 8  | 7 | 5.91 | 2.77 |
| Education            | Cognition       | 2 | 8  | 7  | 5  | 8  | 9 | 5 | 3 | 2  | 5 | 10 | 5 | 5.82 | 2.79 |
| Resilience           | Loneliness      | 5 | 7  | 6  | 7  | 5  | 4 | 8 | 4 | 6  | 7 | 5  | 6 | 5.82 | 1.33 |
| Anxiety              | Resilience      | 4 | 6  | 8  | 5  | 5  | 7 | 3 | 7 | 3  | 8 | 7  | 6 | 5.73 | 1.85 |
| Education            | Neuroplasticity | 3 | 9  | 8  | 6  | 9  | 7 | 3 | 3 | 3  | 5 | 7  | 6 | 5.73 | 2.45 |
| Fatigue              | Cognition       | 4 | 10 | 3  | 8  | 10 | 3 | 0 | 3 | 4  | 8 | 10 | 4 | 5.73 | 3.55 |
| Aphasia Type         | Anxiety         | 3 | 9  | 7  | 7  | 3  | 4 | 3 | 8 | 5  | 5 | 8  | 5 | 5.64 | 2.25 |
| Cognition            | Participation   | 7 | 6  | 5  | 8  | 10 | 5 | 0 | 7 | 5  | 3 | 6  | 6 | 5.64 | 2.62 |
| Fatigue              | Depression      | 4 | 6  | 8  | 9  | 6  | 2 | 4 | 5 | 1  | 7 | 10 | 6 | 5.64 | 2.80 |
| Loneliness           | Fatigue         | 5 | 6  | 3  | 8  | 6  | 6 | 5 | 4 | 6  | 5 | 8  | 6 | 5.64 | 1.50 |
| Motivation           | Depression      | 1 | 1  | 9  | 10 | 5  | 7 | 5 | 6 | 2  | 8 | 7  | 6 | 5.55 | 3.11 |
| Time Post-onset      | Participation   | 3 | 7  | 7  | 8  | 5  | 6 | 5 | 5 | 4  | 3 | 8  | 5 | 5.55 | 1.81 |
| Aphasia Severity     | Anxiety         | 5 | 3  | 8  | 9  | 2  | 5 | 5 | 3 | 8  | 5 | 7  | 5 | 5.45 | 2.30 |
| Aphasia Severity     | Fatigue         | 4 | 7  | 2  | 8  | 5  | 5 | 5 | 8 | 2  | 7 | 7  | 5 | 5.45 | 2.16 |
| Cognition            | Education       | 5 | 6  | 8  | 4  | 7  | 6 | 3 | 3 | 7  | 2 | 9  | 6 | 5.45 | 2.25 |
| Cognition            | Resilience      | 5 | 2  | 7  | 9  | 8  | 8 | 4 | 3 | 5  | 0 | 9  | 5 | 5.45 | 3.01 |

|                      |                  |   |   |    |    |    |   |    |   |    |   |    |   |      |      |
|----------------------|------------------|---|---|----|----|----|---|----|---|----|---|----|---|------|------|
| Fatigue              | Anxiety          | 5 | 5 | 5  | 7  | 8  | 4 | 5  | 4 | 10 | 3 | 4  | 5 | 5.45 | 2.07 |
| Loneliness           | Anxiety          | 4 | 5 | 2  | 8  | 6  | 4 | 5  | 5 | 8  | 5 | 8  | 5 | 5.45 | 1.92 |
| Aphasia Severity     | Social Support   | 7 | 8 | 4  | 8  | 5  | 4 | 0  | 8 | 0  | 5 | 10 | 5 | 5.36 | 3.26 |
| Fatigue              | Resilience       | 3 | 3 | 9  | 8  | 8  | 4 | 2  | 3 | 6  | 5 | 8  | 5 | 5.36 | 2.54 |
| Lesion Size and Site | Fatigue          | 8 | 7 | 7  | 7  | 5  | 6 | 3  | 2 | 3  | 9 | 2  | 6 | 5.36 | 2.50 |
| Participation        | Social Support   | 3 | 7 | 6  | 8  | 10 | 6 | 0  | 4 | 5  | 5 | 5  | 5 | 5.36 | 2.62 |
| Time Post-onset      | Depression       | 5 | 3 | 4  | 8  | 5  | 7 | 7  | 7 | 3  | 2 | 8  | 5 | 5.36 | 2.16 |
| Time Post-onset      | Loneliness       | 5 | 2 | 7  | 8  | 6  | 4 | 8  | 5 | 4  | 5 | 5  | 5 | 5.36 | 1.80 |
| Resilience           | Cognition        | 5 | 3 | 5  | 8  | 8  | 5 | 0  | 3 | 6  | 5 | 10 | 5 | 5.27 | 2.76 |
| Anxiety              | Loneliness       | 3 | 3 | 3  | 10 | 4  | 5 | 4  | 5 | 3  | 7 | 10 | 4 | 5.18 | 2.68 |
| Aphasia Severity     | Motivation       | 4 | 6 | 8  | 9  | 4  | 4 | 3  | 5 | 3  | 5 | 6  | 5 | 5.18 | 1.94 |
| Depression           | Social Support   | 3 | 4 | 2  | 5  | 2  | 6 | 8  | 5 | 5  | 7 | 10 | 5 | 5.18 | 2.48 |
| Time Post-onset      | Aphasia Severity | 4 | 8 | 8  | 2  | 3  | 8 | 7  | 0 | 5  | 7 | 5  | 5 | 5.18 | 2.71 |
| Lesion Size and Site | Depression       | 5 | 8 | 5  | 3  | 5  | 7 | 8  | 3 | 1  | 5 | 6  | 5 | 5.09 | 2.17 |
| Lesion Size and Site | Participation    | 2 | 8 | 8  | 7  | 6  | 5 | 3  | 4 | 4  | 7 | 2  | 5 | 5.09 | 2.26 |
| Participation        | Fatigue          | 0 | 5 | 8  | 7  | 2  | 6 | 8  | 5 | 5  | 5 | 5  | 5 | 5.09 | 2.39 |
| Fatigue              | Neuroplasticity  | 4 | 7 | 0  | 3  | 6  | 8 | 0  | 3 | 8  | 7 | 9  | 6 | 5.00 | 3.19 |
| Resilience           | Depression       | 0 | 6 | 10 | 9  | 3  | 7 | 0  | 4 | 3  | 8 | 5  | 5 | 5.00 | 3.38 |
| Age                  | Resilience       | 3 | 7 | 8  | 10 | 5  | 8 | 3  | 4 | 0  | 3 | 3  | 4 | 4.91 | 2.98 |
| Age                  | Social Support   | 4 | 6 | 9  | 8  | 6  | 4 | 4  | 4 | 3  | 0 | 6  | 4 | 4.91 | 2.47 |
| Neuroplasticity      | Resilience       | 3 | 1 | 9  | 8  | 5  | 4 | 3  | 3 | 3  | 5 | 10 | 4 | 4.91 | 2.88 |
| Participation        | Loneliness       | 2 | 6 | 7  | 10 | 7  | 8 | 0  | 6 | 0  | 7 | 1  | 6 | 4.91 | 3.51 |
| Resilience           | Anxiety          | 4 | 7 | 8  | 6  | 8  | 4 | 0  | 6 | 3  | 8 | 0  | 6 | 4.91 | 2.98 |
| Time Post-onset      | Cognition        | 2 | 5 | 6  | 10 | 3  | 5 | 7  | 3 | 3  | 5 | 5  | 5 | 4.91 | 2.26 |
| Aphasia Type         | Fatigue          | 0 | 7 | 4  | 7  | 4  | 4 | 10 | 6 | 4  | 5 | 2  | 4 | 4.82 | 2.68 |
| Resilience           | Social Support   | 2 | 3 | 7  | 8  | 2  | 5 | 5  | 5 | 2  | 5 | 9  | 5 | 4.82 | 2.44 |
| Aphasia Severity     | Resilience       | 2 | 6 | 6  | 9  | 2  | 6 | 5  | 5 | 1  | 3 | 7  | 5 | 4.73 | 2.45 |
| Aphasia Type         | Cognition        | 3 | 7 | 3  | 10 | 6  | 2 | 3  | 2 | 5  | 3 | 8  | 3 | 4.73 | 2.69 |
| Aphasia Type         | Participation    | 3 | 8 | 8  | 5  | 5  | 7 | 3  | 5 | 2  | 5 | 1  | 5 | 4.73 | 2.33 |
| Motivation           | Loneliness       | 2 | 3 | 3  | 8  | 6  | 2 | 3  | 3 | 6  | 7 | 9  | 3 | 4.73 | 2.53 |
| Motivation           | Social Support   | 5 | 7 | 5  | 8  | 1  | 4 | 3  | 4 | 6  | 2 | 7  | 5 | 4.73 | 2.20 |
| Participation        | Aphasia Severity | 1 | 8 | 0  | 7  | 8  | 4 | 8  | 0 | 10 | 3 | 3  | 4 | 4.73 | 3.61 |

|                      |                  |   |    |   |   |    |   |   |   |   |   |    |   |      |      |
|----------------------|------------------|---|----|---|---|----|---|---|---|---|---|----|---|------|------|
| Participation        | Cognition        | 3 | 3  | 0 | 9 | 9  | 6 | 5 | 2 | 4 | 4 | 7  | 4 | 4.73 | 2.83 |
| Participation        | Resilience       | 4 | 2  | 0 | 7 | 10 | 5 | 8 | 5 | 5 | 0 | 6  | 5 | 4.73 | 3.13 |
| Aphasia Severity     | Neuroplasticity  | 6 | 1  | 6 | 7 | 8  | 5 | 3 | 3 | 5 | 3 | 4  | 5 | 4.64 | 2.06 |
| Cognition            | Loneliness       | 7 | 3  | 6 | 9 | 3  | 4 | 5 | 4 | 5 | 0 | 5  | 5 | 4.64 | 2.34 |
| Social Support       | Neuroplasticity  | 3 | 6  | 3 | 6 | 6  | 5 | 8 | 3 | 2 | 3 | 6  | 5 | 4.64 | 1.91 |
| Time Post-onset      | Motivation       | 2 | 1  | 8 | 8 | 3  | 7 | 4 | 5 | 0 | 3 | 10 | 4 | 4.64 | 3.23 |
| Anxiety              | Cognition        | 3 | 4  | 6 | 8 | 6  | 3 | 7 | 2 | 1 | 3 | 7  | 4 | 4.55 | 2.34 |
| Aphasia Type         | Motivation       | 3 | 9  | 3 | 9 | 5  | 5 | 5 | 4 | 2 | 5 | 0  | 5 | 4.55 | 2.70 |
| Cognition            | Motivation       | 4 | 1  | 7 | 8 | 5  | 4 | 3 | 4 | 7 | 0 | 7  | 4 | 4.55 | 2.58 |
| Resilience           | Fatigue          | 2 | 7  | 8 | 5 | 7  | 3 | 0 | 3 | 4 | 5 | 6  | 5 | 4.55 | 2.42 |
| Resilience           | Neuroplasticity  | 3 | 2  | 2 | 6 | 6  | 5 | 8 | 3 | 0 | 7 | 8  | 5 | 4.55 | 2.70 |
| Time Post-onset      | Fatigue          | 5 | 10 | 0 | 8 | 1  | 7 | 5 | 3 | 2 | 5 | 4  | 5 | 4.55 | 3.01 |
| Neuroplasticity      | Participation    | 4 | 2  | 7 | 8 | 6  | 4 | 0 | 3 | 3 | 3 | 9  | 4 | 4.45 | 2.73 |
| Aphasia Type         | Aphasia Severity | 5 | 1  | 7 | 8 | 7  | 2 | 0 | 5 | 5 | 5 | 3  | 5 | 4.36 | 2.58 |
| Aphasia Type         | Social Support   | 4 | 9  | 4 | 7 | 4  | 3 | 0 | 6 | 4 | 0 | 7  | 4 | 4.36 | 2.80 |
| Fatigue              | Loneliness       | 3 | 4  | 3 | 5 | 5  | 5 | 0 | 3 | 8 | 5 | 7  | 5 | 4.36 | 2.16 |
| Loneliness           | Cognition        | 5 | 4  | 0 | 9 | 7  | 6 | 0 | 3 | 2 | 5 | 7  | 5 | 4.36 | 2.91 |
| Time Post-onset      | Resilience       | 4 | 6  | 4 | 8 | 5  | 6 | 5 | 4 | 3 | 3 | 0  | 4 | 4.36 | 2.06 |
| Cognition            | Depression       | 2 | 0  | 8 | 8 | 6  | 3 | 0 | 2 | 5 | 3 | 10 | 3 | 4.27 | 3.38 |
| Participation        | Anxiety          | 3 | 2  | 8 | 8 | 5  | 5 | 3 | 8 | 1 | 3 | 1  | 3 | 4.27 | 2.72 |
| Depression           | Neuroplasticity  | 4 | 5  | 0 | 5 | 7  | 7 | 0 | 3 | 3 | 7 | 5  | 5 | 4.18 | 2.52 |
| Social Support       | Cognition        | 5 | 3  | 5 | 2 | 8  | 6 | 3 | 3 | 3 | 2 | 6  | 3 | 4.18 | 1.94 |
| Cognition            | Anxiety          | 3 | 2  | 5 | 7 | 7  | 2 | 5 | 3 | 2 | 5 | 4  | 4 | 4.09 | 1.87 |
| Lesion Size and Site | Anxiety          | 4 | 7  | 6 | 9 | 2  | 4 | 5 | 3 | 0 | 5 | 0  | 4 | 4.09 | 2.77 |
| Loneliness           | Neuroplasticity  | 4 | 6  | 0 | 7 | 6  | 3 | 0 | 5 | 7 | 5 | 2  | 5 | 4.09 | 2.55 |
| Neuroplasticity      | Motivation       | 3 | 4  | 4 | 9 | 5  | 6 | 3 | 2 | 2 | 2 | 5  | 4 | 4.09 | 2.12 |
| Cognition            | Fatigue          | 2 | 4  | 1 | 6 | 5  | 3 | 0 | 3 | 5 | 5 | 10 | 4 | 4.00 | 2.72 |
| Fatigue              | Aphasia Severity | 2 | 9  | 0 | 6 | 3  | 6 | 5 | 0 | 2 | 5 | 6  | 5 | 4.00 | 2.83 |
| Lesion Size and Site | Motivation       | 5 | 7  | 6 | 5 | 3  | 7 | 5 | 4 | 2 | 0 | 0  | 5 | 4.00 | 2.49 |
| Motivation           | Cognition        | 0 | 3  | 3 | 8 | 3  | 7 | 0 | 0 | 6 | 4 | 10 | 3 | 4.00 | 3.41 |
| Age                  | Depression       | 1 | 6  | 6 | 6 | 5  | 4 | 0 | 6 | 2 | 4 | 3  | 4 | 3.91 | 2.17 |
| Lesion Size and Site | Loneliness       | 3 | 7  | 8 | 0 | 2  | 3 | 5 | 5 | 2 | 5 | 3  | 3 | 3.91 | 2.34 |

|                      |                      |   |   |   |    |   |   |    |   |   |   |    |   |      |      |
|----------------------|----------------------|---|---|---|----|---|---|----|---|---|---|----|---|------|------|
| Time Post-onset      | Social Support       | 6 | 9 | 0 | 4  | 7 | 7 | 0  | 4 | 3 | 3 | 0  | 4 | 3.91 | 3.11 |
| Age                  | Loneliness           | 3 | 4 | 7 | 5  | 6 | 5 | 0  | 3 | 3 | 0 | 6  | 4 | 3.82 | 2.32 |
| Age                  | Motivation           | 1 | 5 | 8 | 8  | 5 | 4 | 0  | 5 | 0 | 5 | 1  | 5 | 3.82 | 2.93 |
| Aphasia Severity     | Cognition            | 5 | 6 | 0 | 10 | 4 | 4 | 3  | 0 | 2 | 5 | 3  | 4 | 3.82 | 2.82 |
| Aphasia Type         | Neuroplasticity      | 6 | 0 | 2 | 9  | 8 | 7 | 0  | 3 | 0 | 0 | 7  | 3 | 3.82 | 3.63 |
| Aphasia Type         | Resilience           | 5 | 4 | 6 | 8  | 4 | 4 | 4  | 3 | 3 | 0 | 1  | 4 | 3.82 | 2.18 |
| Cognition            | Aphasia Severity     | 7 | 7 | 1 | 10 | 3 | 3 | 0  | 0 | 5 | 3 | 3  | 3 | 3.82 | 3.16 |
| Loneliness           | Social Support       | 1 | 7 | 3 | 8  | 3 | 3 | 0  | 3 | 6 | 0 | 7  | 3 | 3.73 | 2.87 |
| Motivation           | Fatigue              | 0 | 6 | 7 | 0  | 4 | 3 | 5  | 2 | 6 | 7 | 1  | 4 | 3.73 | 2.69 |
| Motivation           | Neuroplasticity      | 3 | 1 | 0 | 5  | 6 | 7 | 5  | 2 | 2 | 5 | 5  | 5 | 3.73 | 2.24 |
| Neuroplasticity      | Depression           | 2 | 1 | 7 | 8  | 5 | 3 | 0  | 2 | 4 | 3 | 6  | 3 | 3.73 | 2.53 |
| Age                  | Cognition            | 2 | 5 | 0 | 7  | 2 | 7 | 0  | 5 | 3 | 4 | 5  | 4 | 3.64 | 2.46 |
| Anxiety              | Social Support       | 4 | 7 | 0 | 7  | 5 | 4 | 0  | 4 | 6 | 0 | 3  | 4 | 3.64 | 2.66 |
| Lesion Size and Site | Resilience           | 2 | 6 | 7 | 5  | 3 | 8 | 4  | 2 | 0 | 3 | 0  | 3 | 3.64 | 2.66 |
| Aphasia Severity     | Aphasia Type         | 6 | 0 | 4 | 5  | 0 | 1 | 8  | 5 | 0 | 2 | 8  | 4 | 3.55 | 3.11 |
| Fatigue              | Social Support       | 3 | 6 | 6 | 7  | 5 | 2 | 0  | 3 | 2 | 3 | 2  | 3 | 3.55 | 2.16 |
| Age                  | Participation        | 0 | 5 | 6 | 6  | 5 | 4 | 0  | 4 | 3 | 5 | 0  | 4 | 3.45 | 2.38 |
| Education            | Motivation           | 0 | 1 | 7 | 7  | 3 | 6 | 0  | 2 | 9 | 0 | 3  | 3 | 3.45 | 3.27 |
| Social Support       | Fatigue              | 0 | 7 | 0 | 5  | 5 | 3 | 5  | 3 | 4 | 3 | 3  | 3 | 3.45 | 2.11 |
| Cognition            | Social Support       | 3 | 3 | 4 | 7  | 6 | 2 | 0  | 4 | 3 | 0 | 5  | 3 | 3.36 | 2.20 |
| Motivation           | Anxiety              | 0 | 1 | 6 | 4  | 4 | 4 | 3  | 3 | 7 | 4 | 1  | 4 | 3.36 | 2.11 |
| Time Post-onset      | Anxiety              | 3 | 5 | 6 | 7  | 2 | 4 | 0  | 5 | 0 | 4 | 1  | 4 | 3.36 | 2.38 |
| Education            | Resilience           | 0 | 4 | 7 | 6  | 6 | 5 | 0  | 0 | 4 | 0 | 4  | 4 | 3.27 | 2.76 |
| Neuroplasticity      | Education            | 0 | 1 | 0 | 8  | 2 | 4 | 0  | 0 | 8 | 3 | 10 | 2 | 3.27 | 3.74 |
| Ethnicity/Race       | Education            | 3 | 3 | 4 | 2  | 5 | 5 | 3  | 4 | 1 | 0 | 5  | 3 | 3.18 | 1.66 |
| Sex                  | Social Support       | 4 | 8 | 5 | 7  | 3 | 4 | 0  | 4 | 0 | 0 | 0  | 4 | 3.18 | 2.89 |
| Time Post-onset      | Lesion Size and Site | 7 | 0 | 0 | 7  | 0 | 3 | 0  | 0 | 2 | 8 | 8  | 2 | 3.18 | 3.57 |
| Age                  | Anxiety              | 0 | 2 | 6 | 7  | 5 | 2 | 0  | 3 | 4 | 5 | 0  | 3 | 3.09 | 2.51 |
| Education            | Participation        | 1 | 7 | 0 | 3  | 7 | 4 | 0  | 0 | 5 | 2 | 5  | 3 | 3.09 | 2.70 |
| Loneliness           | Aphasia Severity     | 1 | 6 | 3 | 5  | 1 | 4 | 5  | 1 | 8 | 0 | 0  | 3 | 3.09 | 2.70 |
| Neuroplasticity      | Fatigue              | 0 | 3 | 4 | 8  | 4 | 4 | 0  | 0 | 3 | 2 | 6  | 3 | 3.09 | 2.55 |
| Aphasia Type         | Lesion Size and Site | 5 | 4 | 0 | 0  | 7 | 0 | 10 | 0 | 7 | 0 | 0  | 0 | 3.00 | 3.74 |

|                      |                      |   |   |   |   |   |   |    |   |   |   |   |   |      |      |
|----------------------|----------------------|---|---|---|---|---|---|----|---|---|---|---|---|------|------|
| Social Support       | Education            | 3 | 8 | 7 | 0 | 5 | 3 | 0  | 0 | 7 | 0 | 0 | 3 | 3.00 | 3.26 |
| Aphasia Severity     | Lesion Size and Site | 0 | 0 | 0 | 6 | 0 | 0 | 10 | 0 | 9 | 7 | 0 | 0 | 2.91 | 4.16 |
| Neuroplasticity      | Aphasia Type         | 3 | 5 | 0 | 7 | 0 | 7 | 0  | 2 | 3 | 3 | 2 | 3 | 2.91 | 2.55 |
| Anxiety              | Aphasia Severity     | 2 | 6 | 0 | 4 | 1 | 4 | 3  | 0 | 6 | 3 | 2 | 3 | 2.82 | 2.09 |
| Lesion Size and Site | Social Support       | 2 | 8 | 4 | 3 | 5 | 0 | 0  | 3 | 3 | 0 | 3 | 3 | 2.82 | 2.40 |
| Neuroplasticity      | Loneliness           | 3 | 3 | 0 | 8 | 2 | 2 | 0  | 2 | 3 | 3 | 5 | 3 | 2.82 | 2.23 |
| Depression           | Aphasia Severity     | 2 | 7 | 0 | 6 | 3 | 7 | 0  | 0 | 2 | 3 | 0 | 2 | 2.73 | 2.80 |
| Motivation           | Aphasia Severity     | 0 | 5 | 0 | 6 | 2 | 6 | 0  | 0 | 3 | 5 | 3 | 3 | 2.73 | 2.49 |
| Age                  | Education            | 2 | 1 | 8 | 1 | 2 | 4 | 5  | 6 | 0 | 0 | 0 | 2 | 2.64 | 2.73 |
| Anxiety              | Neuroplasticity      | 3 | 4 | 2 | 6 | 4 | 3 | 0  | 2 | 2 | 3 | 0 | 3 | 2.64 | 1.75 |
| Education            | Loneliness           | 2 | 0 | 4 | 6 | 6 | 0 | 0  | 2 | 5 | 0 | 4 | 2 | 2.64 | 2.46 |
| Neuroplasticity      | Anxiety              | 3 | 2 | 3 | 6 | 5 | 4 | 0  | 0 | 2 | 3 | 1 | 3 | 2.64 | 1.91 |
| Neuroplasticity      | Lesion Size and Site | 0 | 0 | 7 | 9 | 0 | 3 | 0  | 0 | 7 | 0 | 3 | 0 | 2.64 | 3.47 |
| Neuroplasticity      | Social Support       | 2 | 6 | 3 | 7 | 3 | 0 | 0  | 3 | 0 | 0 | 5 | 3 | 2.64 | 2.54 |
| Sex                  | Participation        | 0 | 7 | 6 | 6 | 5 | 4 | 0  | 0 | 1 | 0 | 0 | 1 | 2.64 | 2.94 |
| Education            | Anxiety              | 2 | 2 | 6 | 4 | 4 | 0 | 0  | 2 | 2 | 5 | 1 | 2 | 2.55 | 1.97 |
| Ethnicity/Race       | Anxiety              | 7 | 4 | 3 | 3 | 1 | 2 | 5  | 3 | 0 | 0 | 0 | 3 | 2.55 | 2.25 |
| Ethnicity/Race       | Participation        | 0 | 5 | 6 | 3 | 0 | 5 | 0  | 2 | 2 | 0 | 5 | 2 | 2.55 | 2.38 |
| Ethnicity/Race       | Social Support       | 2 | 0 | 6 | 3 | 2 | 1 | 0  | 4 | 0 | 5 | 5 | 2 | 2.55 | 2.21 |
| Resilience           | Aphasia Severity     | 0 | 5 | 0 | 8 | 5 | 2 | 0  | 3 | 3 | 2 | 0 | 2 | 2.55 | 2.62 |
| Time Post-onset      | Aphasia Type         | 5 | 4 | 0 | 0 | 0 | 8 | 0  | 3 | 2 | 5 | 0 | 2 | 2.45 | 2.77 |
| Education            | Depression           | 2 | 1 | 0 | 4 | 5 | 1 | 4  | 2 | 2 | 5 | 0 | 2 | 2.36 | 1.86 |
| Education            | Social Support       | 0 | 3 | 5 | 4 | 3 | 1 | 0  | 3 | 1 | 0 | 5 | 3 | 2.27 | 1.95 |
| Sex                  | Depression           | 0 | 6 | 6 | 1 | 6 | 1 | 0  | 3 | 1 | 0 | 0 | 1 | 2.18 | 2.60 |
| Age                  | Aphasia Severity     | 0 | 1 | 7 | 5 | 4 | 3 | 0  | 3 | 0 | 0 | 0 | 1 | 2.09 | 2.47 |
| Ethnicity/Race       | Depression           | 5 | 4 | 5 | 1 | 4 | 1 | 0  | 3 | 0 | 0 | 0 | 1 | 2.09 | 2.12 |
| Sex                  | Anxiety              | 0 | 2 | 7 | 3 | 4 | 2 | 0  | 2 | 2 | 0 | 1 | 2 | 2.09 | 2.07 |
| Participation        | Education            | 0 | 3 | 0 | 8 | 4 | 0 | 0  | 0 | 2 | 0 | 5 | 0 | 2.00 | 2.72 |
| Fatigue              | Age                  | 5 | 0 | 0 | 7 | 0 | 0 | 0  | 0 | 4 | 0 | 4 | 0 | 1.82 | 2.64 |
| Motivation           | Education            | 2 | 4 | 0 | 0 | 5 | 0 | 0  | 0 | 4 | 0 | 5 | 0 | 1.82 | 2.23 |
| Resilience           | Education            | 2 | 5 | 7 | 0 | 0 | 2 | 0  | 0 | 4 | 0 | 0 | 0 | 1.82 | 2.48 |
| Sex                  | Education            | 2 | 0 | 7 | 0 | 2 | 4 | 3  | 2 | 0 | 0 | 0 | 2 | 1.82 | 2.23 |

[illegible]

[illegible]



|                      |               |      |      |      |      |      |      |      |      |      |      |      |   |      |      |
|----------------------|---------------|------|------|------|------|------|------|------|------|------|------|------|---|------|------|
| Lesion Size and Site | Age           | 0    | 0    | 0    | 0    | 0    | 0    | 0    | 0    | 0    | 0    | 0    | 0 | 0.00 | 0.00 |
| Lesion Size and Site | Education     | 0    | 0    | 0    | 0    | 0    | 0    | 0    | 0    | 0    | 0    | 0    | 0 | 0.00 | 0.00 |
| Participation        | Age           | 0    | 0    | 0    | 0    | 0    | 0    | 0    | 0    | 0    | 0    | 0    | 0 | 0.00 | 0.00 |
|                      | <i>Median</i> | 3    | 4    | 4    | 7    | 4    | 4    | 0    | 3    | 3    | 3    | 4    |   |      |      |
|                      | <i>M</i>      | 2.77 | 3.97 | 4.16 | 5.54 | 4.06 | 3.78 | 2.70 | 2.77 | 3.28 | 3.18 | 4.22 |   |      |      |
|                      | <i>SD</i>     | 2.36 | 3.11 | 3.54 | 3.25 | 2.81 | 2.93 | 3.29 | 2.43 | 2.61 | 3.05 | 3.67 |   |      |      |
