# Supplementary material
Source: publisher figshare collection journal article supplement (https://asha.figshare.com/articles/dataset/_/27105865)

## Supplemental Material S2. Centrality metrics of variables by participant.

P1

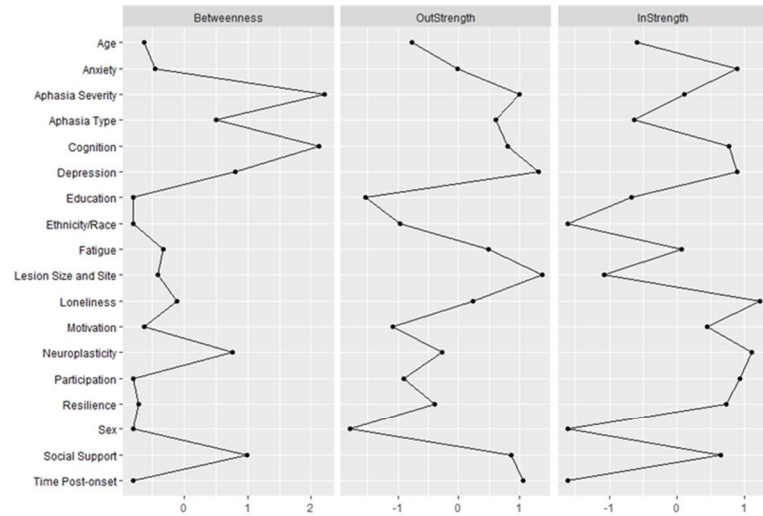

P2

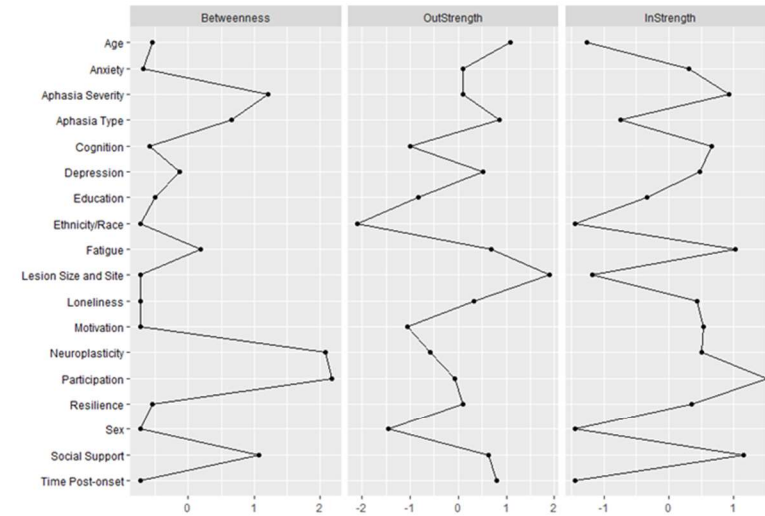

P3

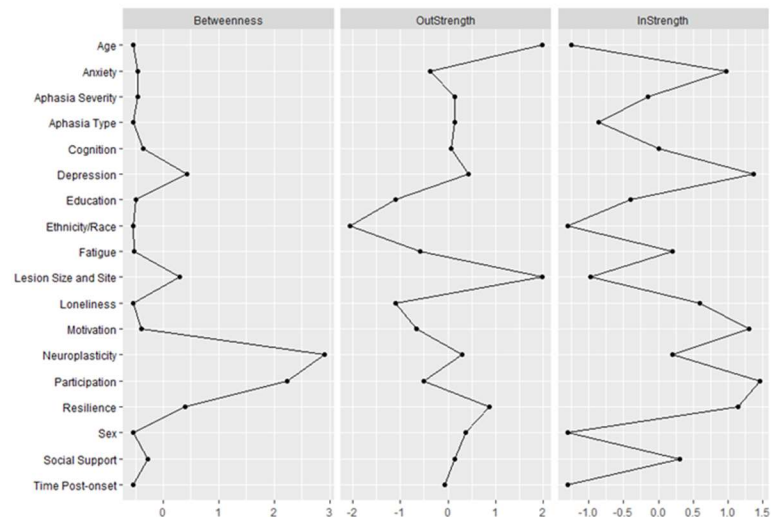

P4

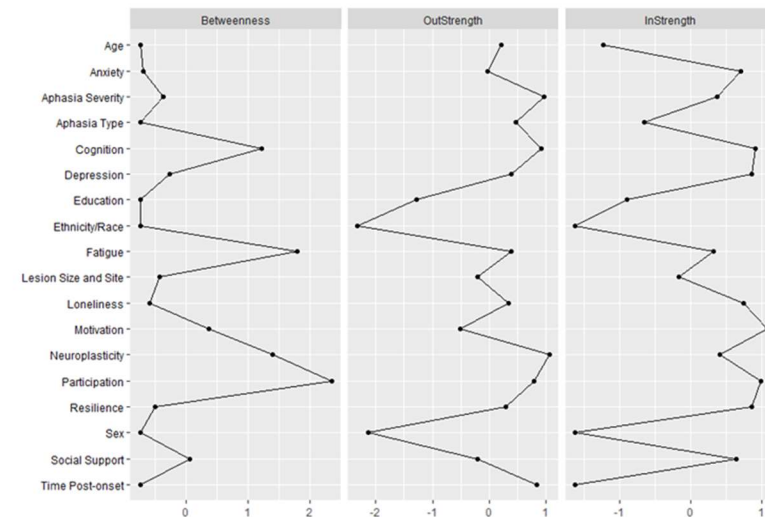

P5

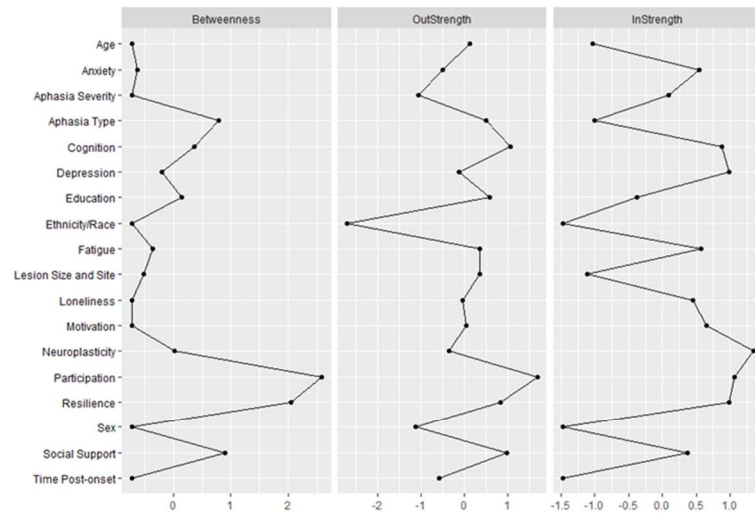

P6

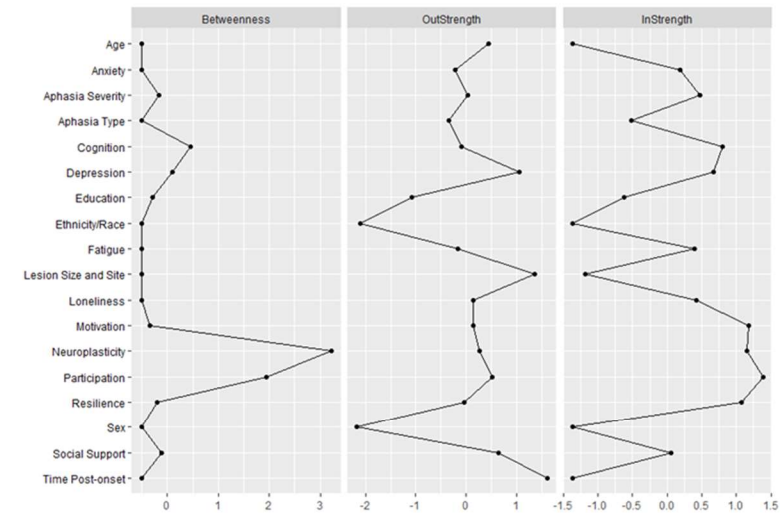

P7

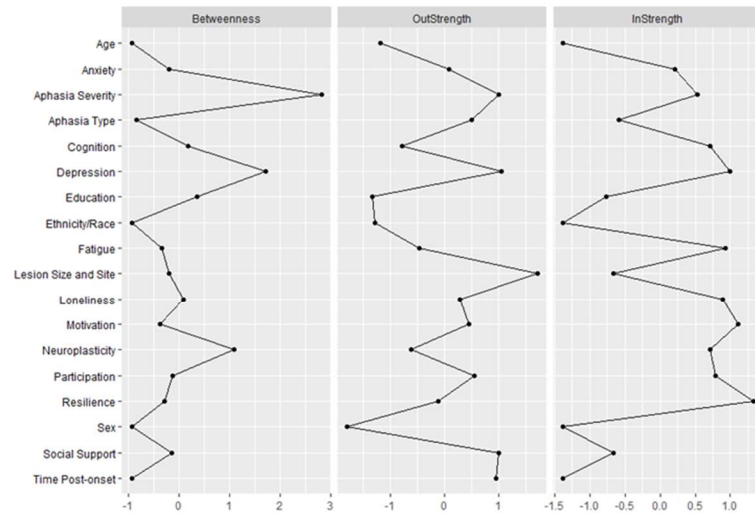

P8

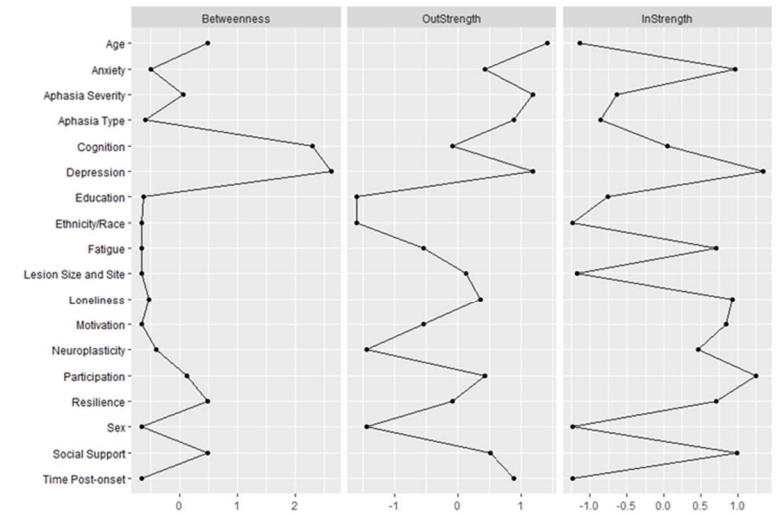

P9

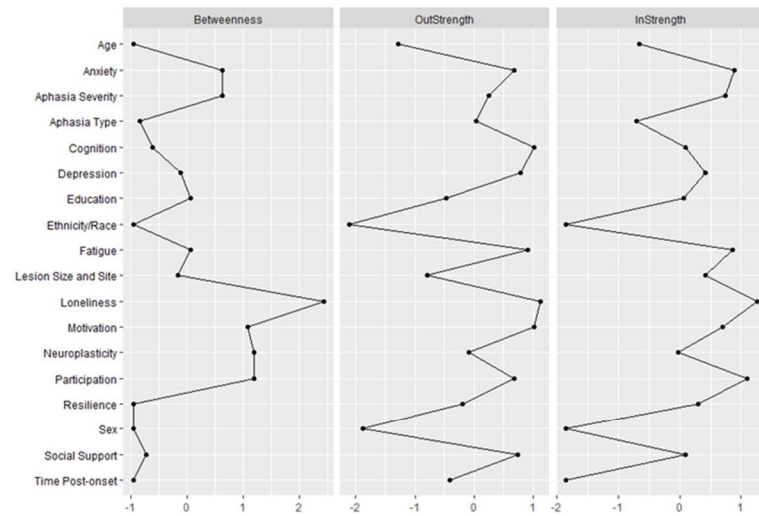

P10

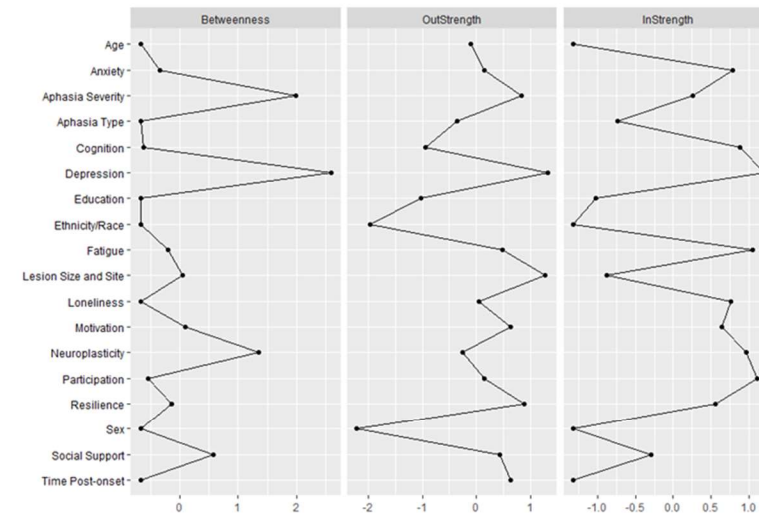

P11

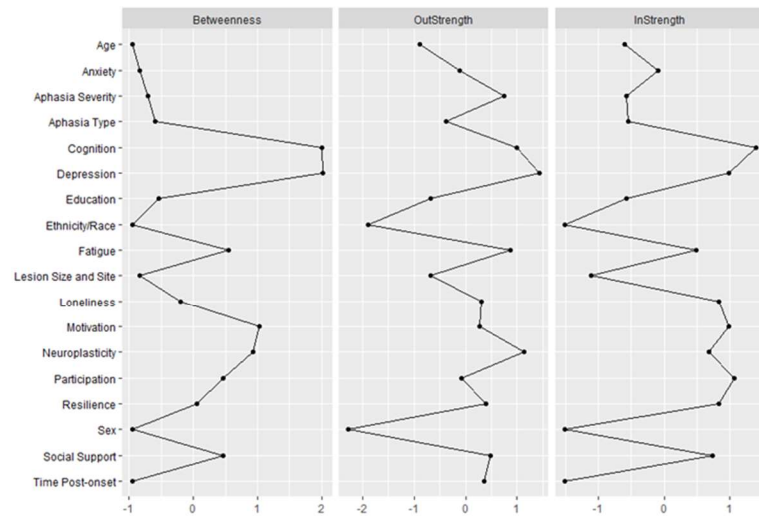

Supplement: Supplementary file 1 [file 1]
